# Supplementary material
Source: publisher figshare collection journal article supplement (https://acs.figshare.com/ndownloader/files/13171433)
Supplement: Supplementary file 1 [file 13171433]

# Supporting Information

## **PtTe Monolayer: Two-dimensional Electrocatalyst with High Basal Plane Activity towards Oxygen Reduction Reaction**

Yu Wang,<sup>†</sup> Yafei Li,<sup>\*,†</sup> and Thomas Heine<sup>\*,‡,§</sup>

<sup>†</sup>Jiangsu Collaborative Innovation Centre of Biomedical Functional Materials, Jiangsu Key Laboratory of New Power Batteries, School of Chemistry and Materials Science, Nanjing Normal University, Nanjing 210023, China.

<sup>‡</sup>TU Dresden, School of Science, Theoretical Chemistry, Bergstraße 66c, 01062 Dresden, Germany.

<sup>§</sup> Helmholtz-Zentrum Dresden-Rossendorf, Forschungsstelle Leipzig, Permoserstraße 15, 04318 Leipzig, Germany

### **Corresponding Author**

\*liyafei@njnu.edu.cn

\*thomas.heine@tu-dresden.de

## Methods

### Computational details.

Density functional theory calculations were carried out using projector-augmented wave approach<sup>1,2</sup> and the Perdew–Burke–Ernzerhof exchange-correlation functional,<sup>3</sup> as implemented in the VASP.<sup>4,5</sup> The cutoff energy was chosen at 500 eV, and the Brillouin zone was sampled using  $k$ -points of  $0.02 \text{ \AA}^{-1}$ . Fermi-level smearing of 0.05 and 0.01 eV were adopted for PtTe and gas-phase species calculations, respectively. The convergence thresholds for energy and atomic forces were set as  $1 \times 10^{-5}$  eV and  $0.01 \text{ eV/\AA}$ , respectively. The distance of vacuum space was set to about  $20 \text{ \AA}$ . For multilayer systems, van der Waals interactions were included utilizing Grimme's D3 method.<sup>6</sup>

The phonon spectrum was computed using Phonopy code<sup>7</sup> with density functional perturbation theory (DFPT).<sup>8</sup> Molecular dynamic simulations were performed using the  $(4 \times 4)$  PtTe supercell and the NVT ensemble, and were lasted for 10 ps with a time step of 1.0 fs, which was controlled by Nosé-Hoover method.<sup>9</sup> The climbing-image nudged elastic band (CI-NEB) method<sup>10</sup> as implemented in VASP was employed to simulate the reaction energy barrier.

### ORR Mechanism.

The dissociative and associative mechanism pathways are generally the following equations (S1) and (S2), respectively.

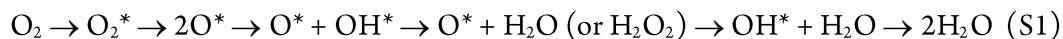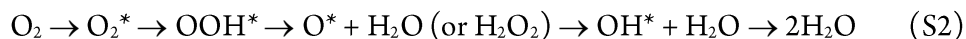

where \* denotes an adsorption site. Note that the protons and electrons have been left out for clarity. The  $\text{H}_2\text{O}_2$  is the product of the 2e ORR.

### Reaction Free Energies.

We used a  $(3 \times 3)$  supercell and explored the ORR performance of PtTe monolayer with the computational hydrogen electrode (CHE) model<sup>11</sup>.

The free energy of each species ( $G$ ) can be expressed as:

$$G = E_{\text{DFT}} + E_{\text{ZPE}} + \int C_p dT - TS \quad (\text{S3})$$

where  $E_{\text{DFT}}$ ,  $E_{\text{ZPE}}$ , and  $S$  are ground state energy, zero point energy, and entropy, respectively.  $T$  is temperature taken as 298.15 K. For adsorbates,  $E_{\text{ZPE}}$  and  $S$  are obtained by vibrational frequencies calculations with harmonic approximation and neglecting contributions from the slab, while for molecules these are taken from the NIST database.<sup>12</sup> These contributions to free energies are listed in Table S1. Besides, solvent effects on  $\text{OH}^*$  and  $\text{OOH}^*$  have been considered by using the Poisson-Boltzmann implicit solvation model<sup>13</sup>; the dielectric constant  $\epsilon$  is taken as 80 for water. The free energy of  $\text{O}_2$  was derived as  $G_{\text{O}_2} = 2G_{\text{H}_2\text{O}} - 2G_{\text{H}_2} - 4.92 \text{ eV}$ , since

O<sub>2</sub> in triplet ground state is notoriously poorly described by DFT calculations. The adsorption free energy for the adsorbates ( $\Delta G_{\text{ads}}$ ), including O<sub>2</sub>\* ( $\Delta G_{\text{O}_2^*}$ ), O\* ( $\Delta G_{\text{O}^*}$ ), OH\* ( $\Delta G_{\text{OH}^*}$ ), and OOH\* ( $\Delta G_{\text{OOH}^*}$ ), can be calculated by:

$$\Delta G_{\text{ads}} = \Delta E_{\text{ads}} + \Delta E_{\text{ZPE}} - T\Delta S \quad (\text{S4})$$

where  $\Delta E_{\text{ads}}$  is adsorption energy of adsorbates, and  $\Delta E_{\text{ZPE}}$  and  $\Delta S$  are the difference of  $E_{\text{ZPE}}$  and  $S$ , respectively. Moreover, in accordance with the CHE model, the effects of electrode potential ( $U$ ) and pH on ORR can be treated as an energy shift to free energy change in the electrochemical steps:  $\Delta G_U = -eU$  and  $\Delta G_{\text{pH}} = -k_B T \ln 10 \times \text{pH}$ . The free energy diagram of ORR shown in this paper has performed a potential correction to be standard.

### Polarization Curve Simulation.

Following the kinetic model developed by Hansen et al.,<sup>14,15,16</sup> we simulated the polarization curve of PtTe monolayer. Here, we focused on the dominating dissociative mechanism pathway, as O<sub>2</sub> dissociation on PtTe monolayer is identified to be quite thermodynamically and kinetically favourable. The O<sub>2</sub> molecule diffusion, adsorption, and electrochemical reduction steps are listed by the following equations:

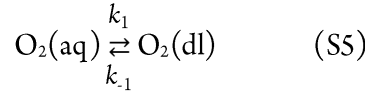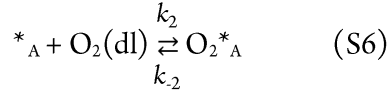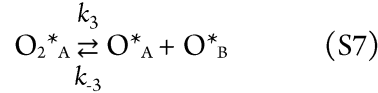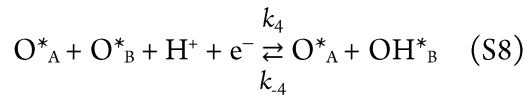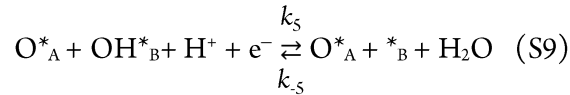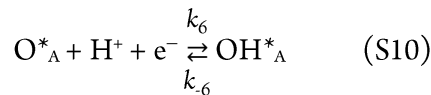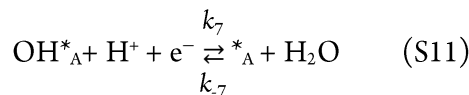

where the two different adsorption sites derived from O<sub>2</sub> dissociation are highlighted by  $*_A$  and  $*_B$ . O<sub>2</sub>(aq) and O<sub>2</sub>(dl) represent O<sub>2</sub> in the electrolyte and the catalyst-electrolyte interface, respectively. Note that equations

(S5), (S6), and (S7) are non-electrochemical steps, and the rest of equations are electrochemical steps. Based on the above reduction steps, we can gain the rate equations of each species, such as,

$$\frac{\partial x_{O_2(dl)}}{\partial t} = k_1 x_{O_2(aq)} - k_{-1} x_{O_2(dl)} - k_2 x_{O_2(dl)} \theta_{*A} + k_{-2} \theta_{O_2*A} \quad (S12)$$

$$\frac{\partial \theta_{OH*A}}{\partial t} = k_6 \theta_{O*A} - k_{-6} \theta_{OH*A} - k_7 \theta_{O*A} + k_{-7} \theta_{*A} x_{H_2O} \quad (S13)$$

$$\frac{\partial \theta_{O*B}}{\partial t} = k_3 \theta_{O_2*A} \theta_{*B} - k_{-3} \theta_{O*A} \theta_{O*B} - k_4 \theta_{*B} + k_{-4} \theta_{OH*B} \quad (S14)$$

Here the  $x_{O_2(aq)}$  and  $x_{H_2O}$  are taken as  $2.34 \times 10^{-5}$  and 1, respectively.<sup>13</sup>  $\theta$  represents the coverage of the species.

These rate equations can be solved at steady state, and further infer the turn over frequency (TOF).

For non-electrochemical step  $i$ , its equilibrium constant ( $K_i$ ) can be expressed as:

$$K_i = \exp\left(-\frac{\Delta G_i}{k_B T}\right) \quad (S15)$$

where  $\Delta G_i$  is the free energy change of step  $i$ , and  $k_B$  is the Boltzmann constant. The rate constant ( $k_i$ ) is given by:

$$k_i = \nu_i \exp\left(-\frac{E_{a,i}}{k_B T}\right) \quad (S16)$$

where  $\nu_i$  is the pre-exponential factor, and  $E_{a,i}$  is the activation energy.

While for electrochemical step,  $K_i$  is associated with the reaction potential ( $U$  vs. RHE), given by:

$$K_i = \exp\left(-\frac{e(U - U_i)}{k_B T}\right) \quad (S17)$$

where  $U_i$  is the reversible potential of step  $i$  deduced by  $U_i = -\Delta G_i/e$ . And the  $k_i$  is written as:

$$k_i = A_i \exp\left(-\frac{E_{a,i}}{k_B T}\right) \exp\left(-\frac{e\beta_i(U - U_i)}{k_B T}\right) \quad (S18)$$

where  $A_i$  is an effective pre-exponential factor taken as  $10^9$ , and  $\beta_i$  is the symmetric factor taken as 0.5.<sup>15</sup> Since the  $E_{a,i}$  of electrochemical ORR steps are generally small, range from 0.10 to 0.26 eV,<sup>17,18</sup> we adopted  $E_{a,i} = 0.25$  eV for all the electrochemical steps of ORR on PtTe monolayer.

Moreover, the rate constants for all the reverse reaction ( $k_{-i}$ ), can be deduced by:

$$k_{-i} = \frac{k_i}{K_i} \quad (S19)$$

Finally, the current density ( $j$ ) can be calculated by:

$$j = e\rho TOF_e - \quad (S20)$$

**Table S1.** Zero-point energy correction ( $E_{\text{ZPE}}$ ), entropy contribution ( $TS$ ), and total free energy correction ( $G - E_{\text{elec}}$ ) of the studied systems.

| Species          | $E_{\text{ZPE}}$ (eV) | $-TS$ (eV) | $G - E_{\text{elec}}$ (eV) |
|------------------|-----------------------|------------|----------------------------|
| H <sub>2</sub>   | 0.27                  | -0.40      | -0.13                      |
| H <sub>2</sub> O | 0.56                  | -0.67      | -0.11                      |
| O <sub>2</sub> * | 0.13                  | -0.15      | -0.02                      |
| O*               | 0.07                  | -0.06      | 0.01                       |
| OH*              | 0.34                  | -0.13      | 0.21                       |
| OOH*             | 0.43                  | -0.21      | 0.22                       |

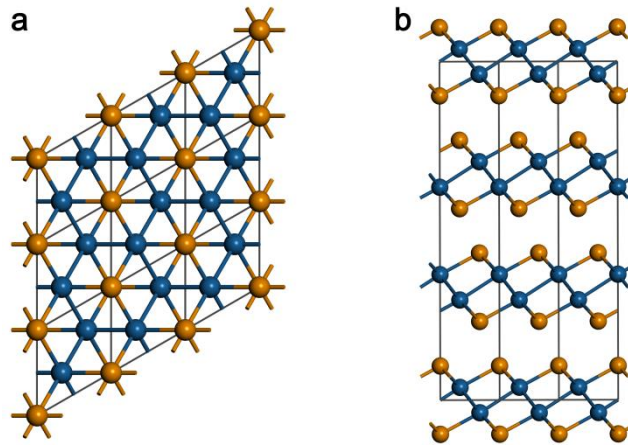

**Figure S1.** (a) Top and (b) side views of bulk PtTe. The blue and brown balls represent Pt and Te atoms, respectively.

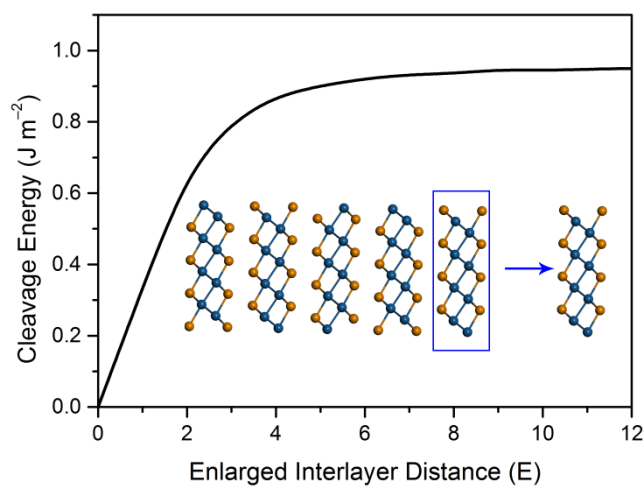

**Figure S2.** Cleavage energy estimation for the formation of PtTe monolayer. Increasing the distance between the exfoliated PtTe monolayer and bulk, the energy increases and reaches convergence at  $\sim 5$  Å.

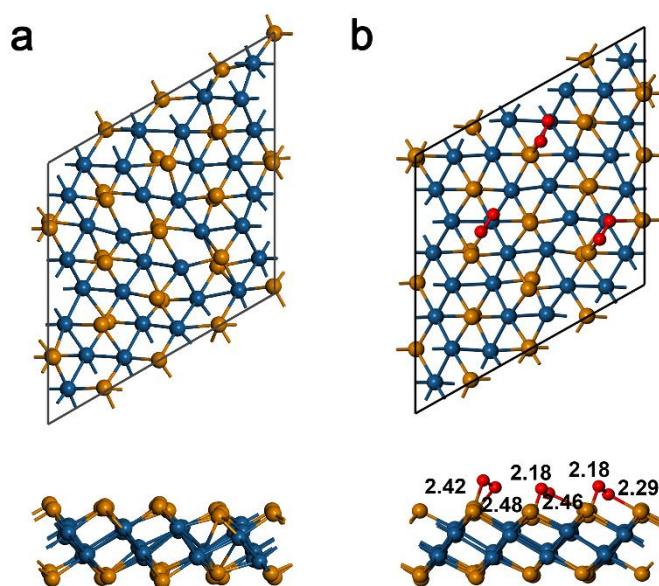

**Figure S3.** Snapshots of the equilibrium structure of (a) PtTe monolayer at 1200 K and (b) O<sub>2</sub> on PtTe monolayer at 300 K, respectively, at the end of 10 ps first-principles molecular dynamics simulation. The Te-O bond lengths are given in Å.

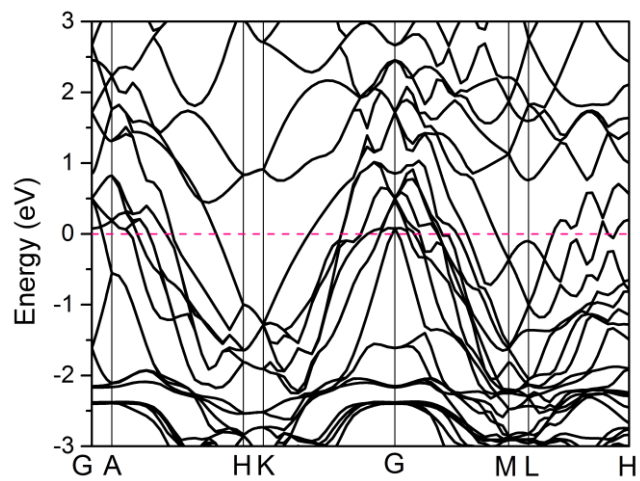

**Figure S4.** Band structure of bulk PtTe. The Fermi level is assigned at 0 eV.

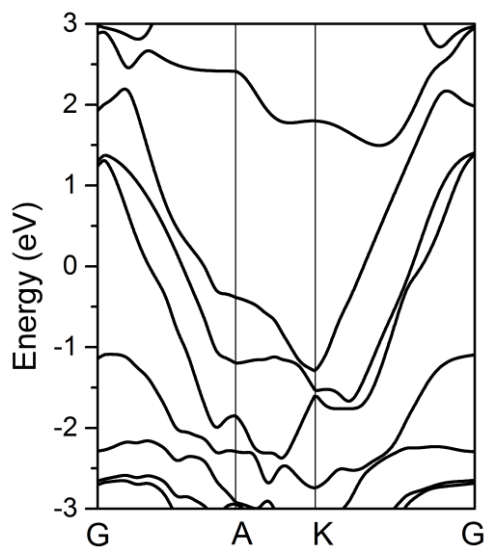

**Figure S5.** HSE06 band structure of PtTe monolayer. The Fermi level is assigned at 0 eV.

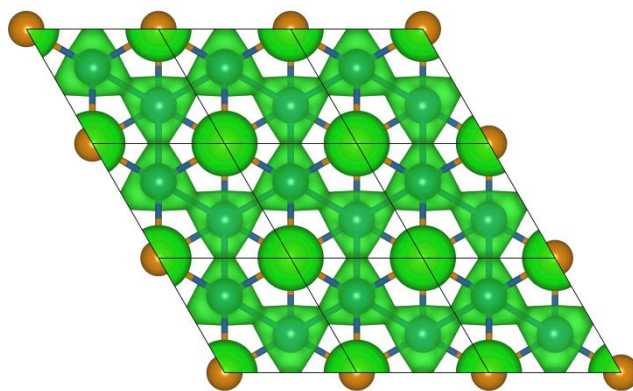

**Figure S6.** Partial charge density around the Fermi level of PtTe Monolayer ( $-0.5 \text{ eV} < E - E_F < 0 \text{ eV}$ ).

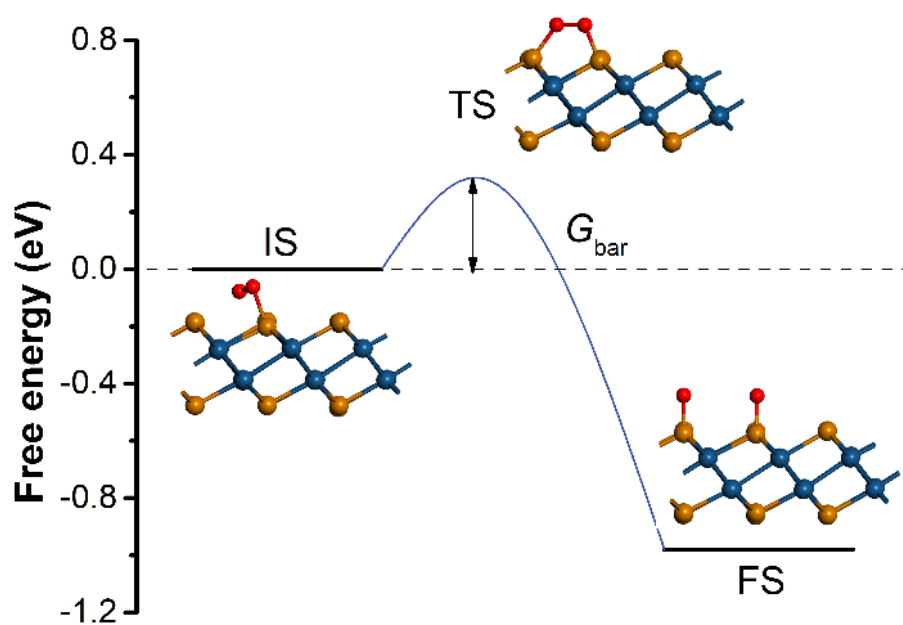

**Figure S7.**  $\text{O}_2$  dissociation on PtTe monolayer.



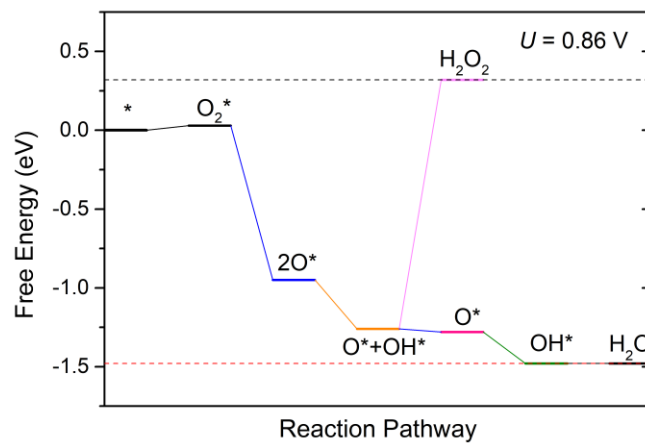

**Figure S8.** Free energy diagrams for the dissociative ORR pathway on PtTe basal plane at  $U = 0.86$  V.

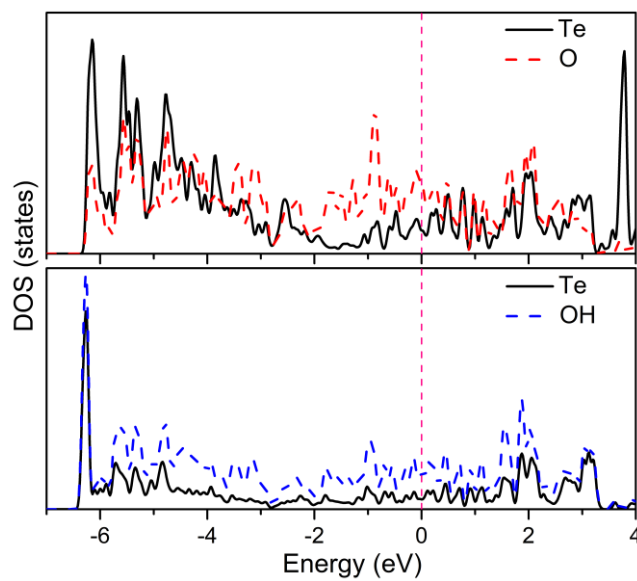

**Figure S9.** Partial density of states of the intermediates and the Te site-5p orbital.

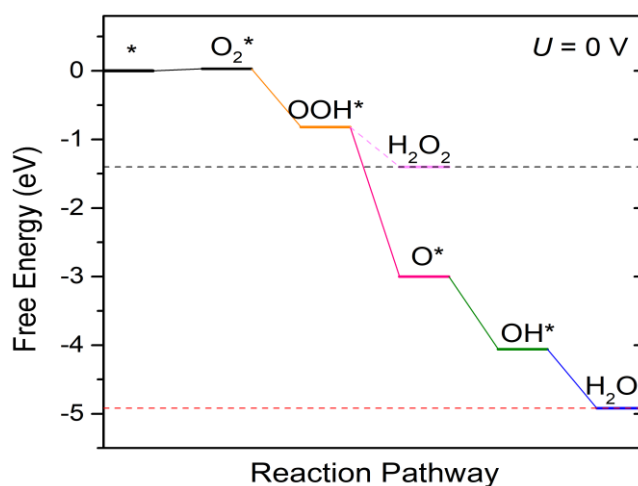

**Figure S10.** Free energy diagrams for the associative ORR pathway on PtTe basal plane at  $U = 0$  V. The rate-determining step is the reduction of  $\text{OH}^*$  to  $\text{H}_2\text{O}$  with a  $\Delta G$  of  $-0.85$  eV.

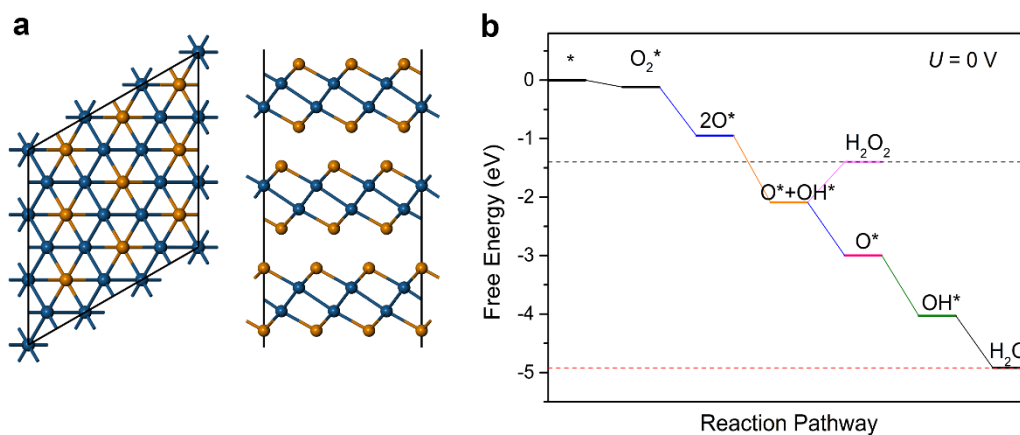

**Figure S11.** (a) Top (left) and side (right) views of PtTe trilayer in a  $3 \times 3$  supercell. (b) Free energy diagram for ORR pathway on PtTe trilayer at  $U = 0$  V. The rate-determining step is the reduction of  $\text{OH}^*$  to  $\text{H}_2\text{O}$  with a  $\Delta G$  of  $-0.89$  eV.

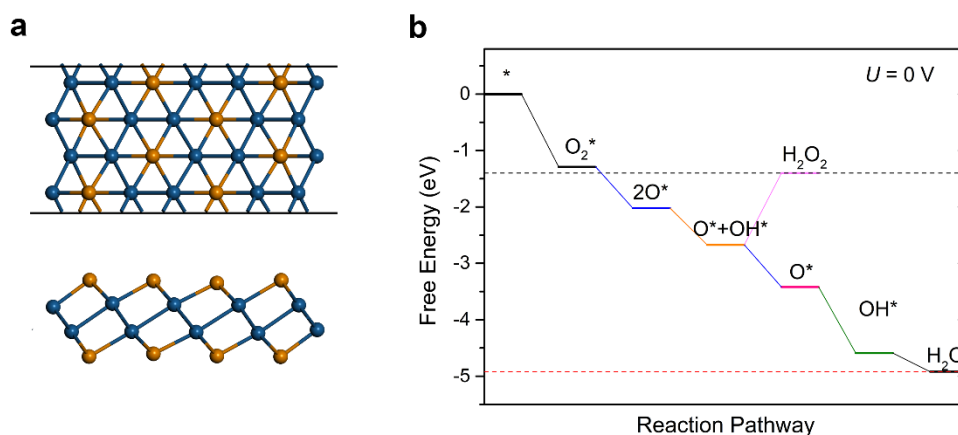

**Figure S12.** (a) Top (upper) and side (bottom) views of edge sites of PtTe modeled by a ribbon model. (b) Free energy diagram for ORR pathway PtTe edge at  $U = 0$  V. The rate-determining step is the reduction of  $OH^*$  to  $H_2O$  with a  $\Delta G$  of just  $-0.33$  eV due to the too strong binding strength of  $OH^*$ .

## References

- <sup>1</sup> Blöchl, P. E. *Phys. Rev. B* **1994**, 50, 17953.
- <sup>2</sup> Kresse, G.; Joubert, D. *Phys. Rev. B* **1999**, 59, 1758.
- <sup>3</sup> Perdew, J. P.; Burke, K.; Ernzerhof, M. *Phys. Rev. Lett.* **1996**, 77, 3865.
- <sup>4</sup> Kresse, G.; Furthmüller, J. *Comput. Mater. Sci.* **1996**, 6, 15.
- <sup>5</sup> Kresse, G.; Furthmüller, J. *Phys. Rev. B: Condens. Matter Mater. Phys.* **1996**, 54, 11169.
- <sup>6</sup> Grimme, S.; Ehrlich, S.; Goerigk, L. *J. Comput. Chem.* **2011**, 32, 1456.
- <sup>7</sup> Togo, A.; Oba, F.; Tanaka, I. *Phys. Rev. B* **2008**, 78, 134106.
- <sup>8</sup> Baroni, S.; De Gironcoli, S.; Dao Corso, A.; Giannozzi, P. *Rev. Mod. Phys.* **2001**, 73, 515.
- <sup>9</sup> Martyna, G. J.; Klein, M. L.; Tuckerman, M. E. *J. Chem. Phys.* **1992**, 97, 2635.
- <sup>10</sup> Henkelman, G.; Uberuaga, B. P.; Jonsson, H. *J. Chem. Phys.* **2000**, 113, 9901.
- <sup>11</sup> Nørskov, J. K.; Rossmeisl, J.; Logadottir, A.; Lindqvist, L.; Kitchin, J. R.; Bligaard, T.; Jónsson, H. *J. Phys. Chem. B* **2004**, 108, 17886.
- <sup>12</sup> Computational Chemistry Comparison and Benchmark Database. <http://cccbdb.nist.gov/>.
- <sup>13</sup> Mathew, K.; Sundararaman, R.; Letchworth-Weaver, K.; Arias, T. A.; Hennig, R. G. *J. Chem. Phys.* **2014**, **140**, 084106.
- <sup>14</sup> Hansen, H. A.; Varley, J. B.; Peterson, A. A.; Nørskov, J. K. *J. Phys. Chem. Lett.* **2013**, 4, 388.
- <sup>15</sup> Hansen, H. A.; Viswanathan, V.; Nørskov, J. K. *J. Phys. Chem. C* **2014**, 118, 6706.
- <sup>16</sup> Li, Y.; Zhang, S.; Yu, J.; Wang, Q.; Sun, Q.; Jena, P. *Nano Res.* **2015**, 8, 2901.
- <sup>17</sup> Tripković, V.; Skúlason, E.; Siahrostami, S.; Nørskov, J. K.; Rossmeisl, J. *Electrochim. Acta* **2010**, 55, 7975.
- <sup>18</sup> Wang, Y.; Yuan, H.; Li, Y.; Z. Chen, *Nanoscale* **2015**, 7, 11633.
